# Supplementary material for: Fengycins, Cyclic Lipopeptides from Marine Bacillus subtilis Strains, Kill the Plant-Pathogenic Fungus Magnaporthe grisea by Inducing Reactive Oxygen Species Production and Chromatin Condensation
Source: PubMed Central journal article supplement (PMC6122000; doi:10.1128/aem.00445-18), 2018-08-31
Supplement: zam018188718s1.pdf [file zam018188718s1.pdf]

## Supplementary information

**Cyclic lipopeptides fengycins from marine bacterium *Bacillus subtilis* kill plant pathogenic fungus *Magnaporthe grisea* by inducing reactive oxygen species production and chromatin condensation**

Linlin Zhang<sup>a,b,c,d</sup>, Chaomin Sun<sup>a,b,d\*</sup>

CAS Key Laboratory of Experimental Marine Biology, Institute of Oceanology, Chinese Academy of Sciences, Qingdao, 266071, China<sup>a</sup>; Laboratory for Marine Biology and Biotechnology, Qingdao National Laboratory for Marine Science and Technology, Qingdao, 266071, China<sup>b</sup>; University of Chinese Academy of Sciences, Beijing, 100049, China<sup>c</sup>. Center for Ocean Mega-Science, Chinese Academy of Sciences, Qingdao, 266071, China<sup>d</sup>.

\*Corresponding author

Chaomin Sun Tel.: +86 532 82898857; fax: +86 532 82898648.

E-mail address: [sunchaomin@qdio.ac.cn](mailto:sunchaomin@qdio.ac.cn)

**TABLE S1** General genome features of *B. subtilis* BS155

| Features              | Value     |
|-----------------------|-----------|
| Genome size (bp)      | 4,325,794 |
| G+C content (%)       | 43.49     |
| Chromosome            | 1         |
| Total number of genes | 6,222     |
| rRNAs                 | 30        |
| tRNAs                 | 86        |
| Genomic island        | 10        |
| NRPS and PKS          | 11        |

**TABLE S2** Oligonucleotides used in this study

| Oligonucleotides | Sequence (5'-3')      |
|------------------|-----------------------|
| Actin-se         | AGCGTGGTATCCTCACTTTGC |
| Actin-an         | ATCTGCGTCATCTTCTCTCGG |
| Conden1-se       | ACATCTGCCTCGAGCAATACG |
| Conden1-an       | AGCCTTGGGCTTCAGGAACA  |
| Conden2-se       | TGTGCGTGTCGGCAGAATACT |
| Conden2-an       | CATGTCACCAAGGGCGATAAC |

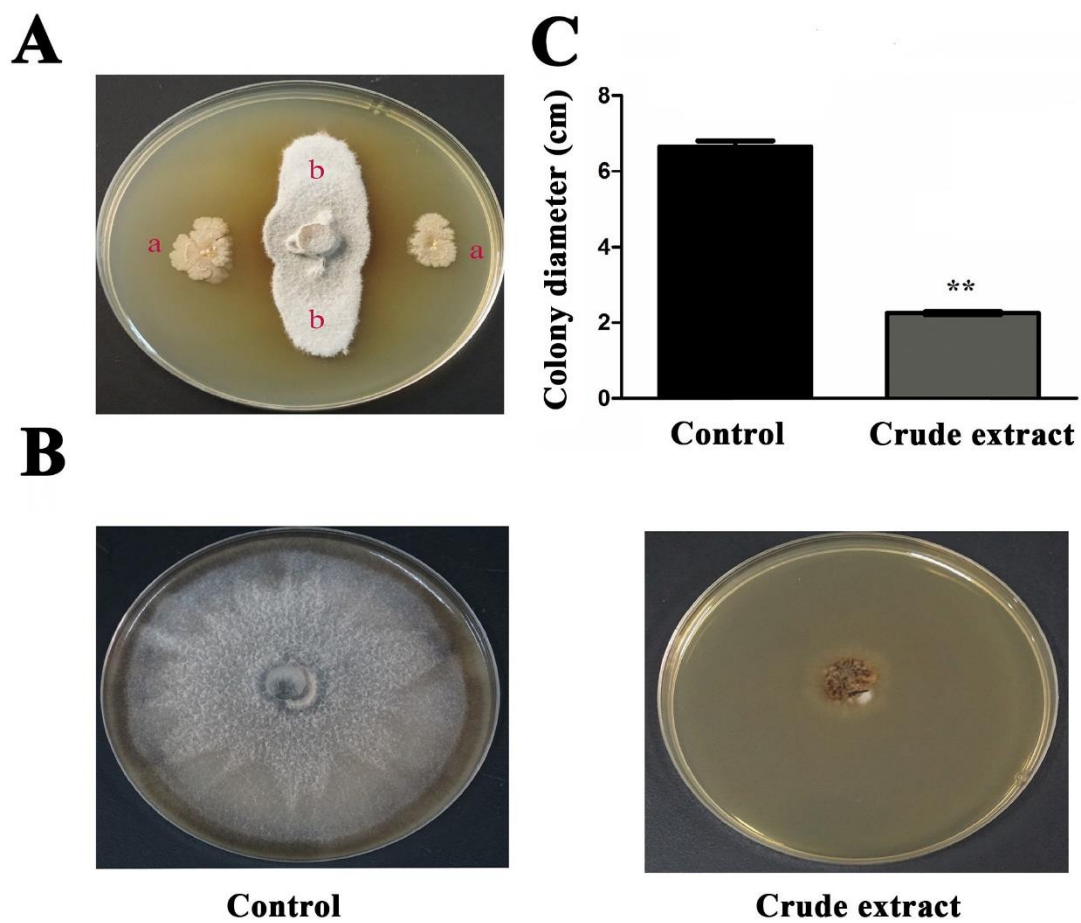

**FIG S1** Antifungal activity of marine strain *B. subtilis* BS155 and its crude extract against *Magnaporthe grisea*. (A) Antagonistic activity of marine bacterium *B. subtilis* BS155 against *M. grisea*. a, strain *B. subtilis* BS155; b, fungal pathogen *M. grisea*. (B) Representative pictures of antagonistic activity assay of crude extracts (40 µg/mL) from *B. subtilis* BS155 against *M. grisea*. (C) Quantitative assays of antagonistic activity of crude extracts (40 µg/mL) from *B. subtilis* BS155 against *M. grisea*. \*\*,  $P < 0.01$ .

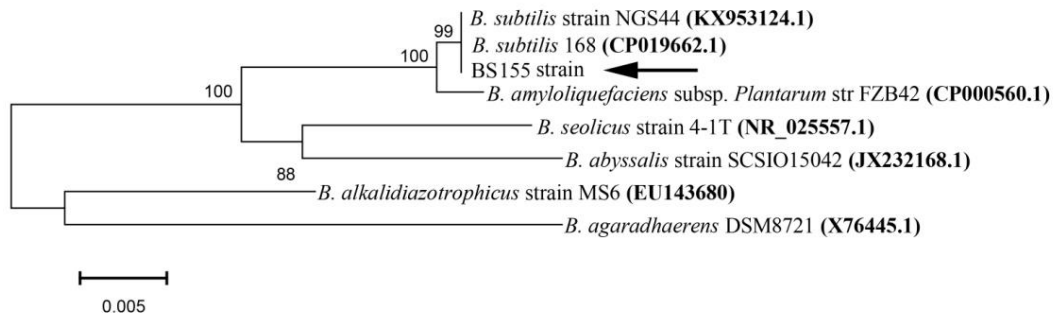

**FIG S2** The consensus phylogenetic tree of marine bacterium BS155 with other related strains obtained from GenBank (accession numbers are indicated after the species name) constructed by the neighbor-joining method, respectively. Numbers above the branches are bootstrap values based on 1000 replicates.

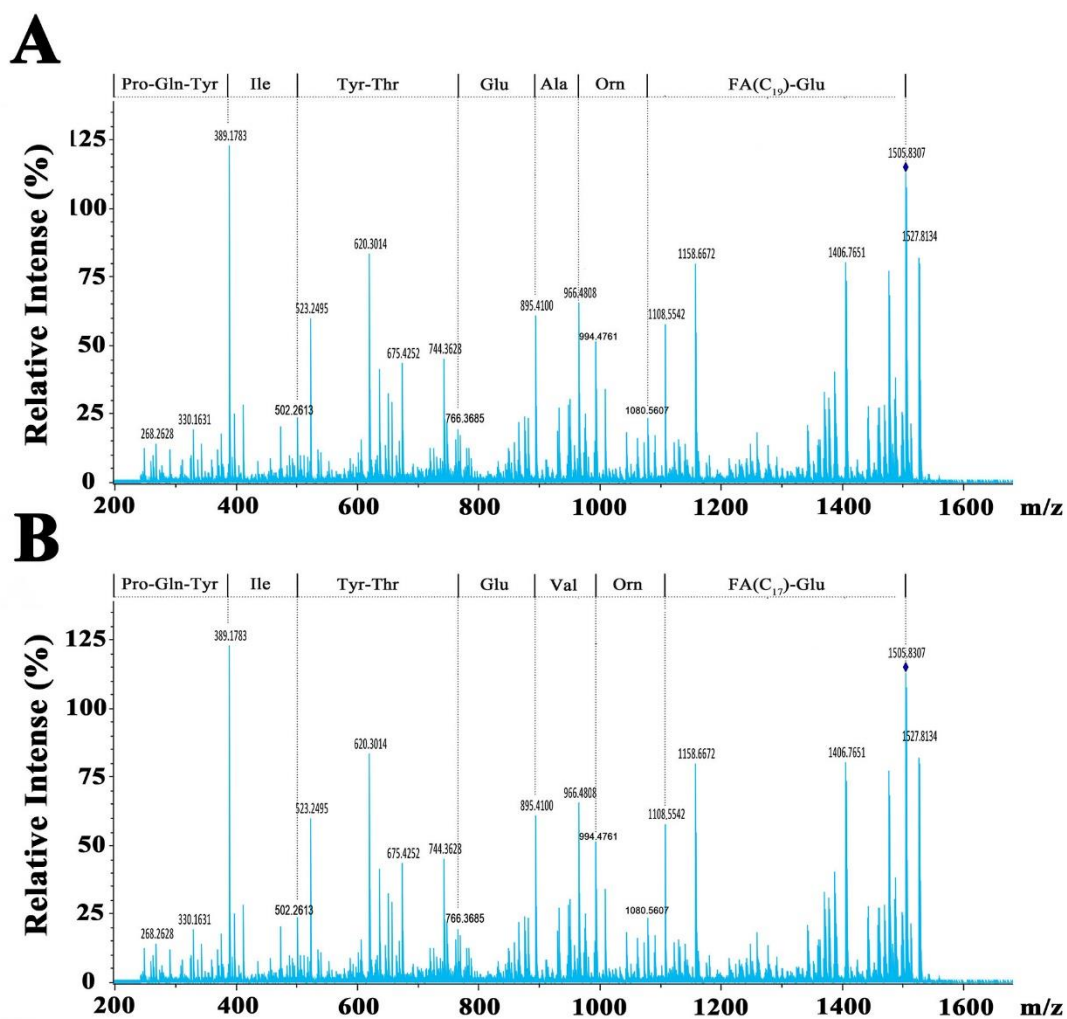

**FIG S3** Fragmentation MS/MS spectrum of active compound peaks isolated from *B. subtilis* BS155. (A) The MS/MS spectrum of C<sub>19</sub> fengycin A ion peaks from 200 Da to 1800 Da. (B) The MS/MS spectrum of C<sub>17</sub> fengycin B ion peaks from 500 Da to 1500 Da.

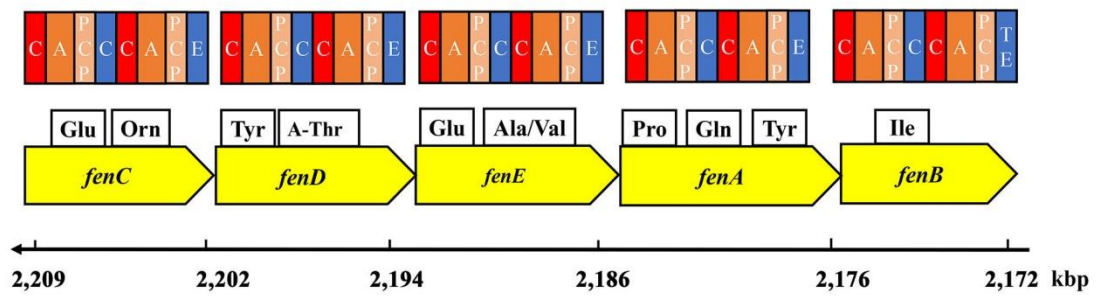

***fenA-E* gene cluster in *B. subtilis* BS155**

**FIG S4** The predicted *fenA-E* gene cluster which was responsible for fengycin BS155 biosynthesis in the genome of *B. subtilis* BS155.

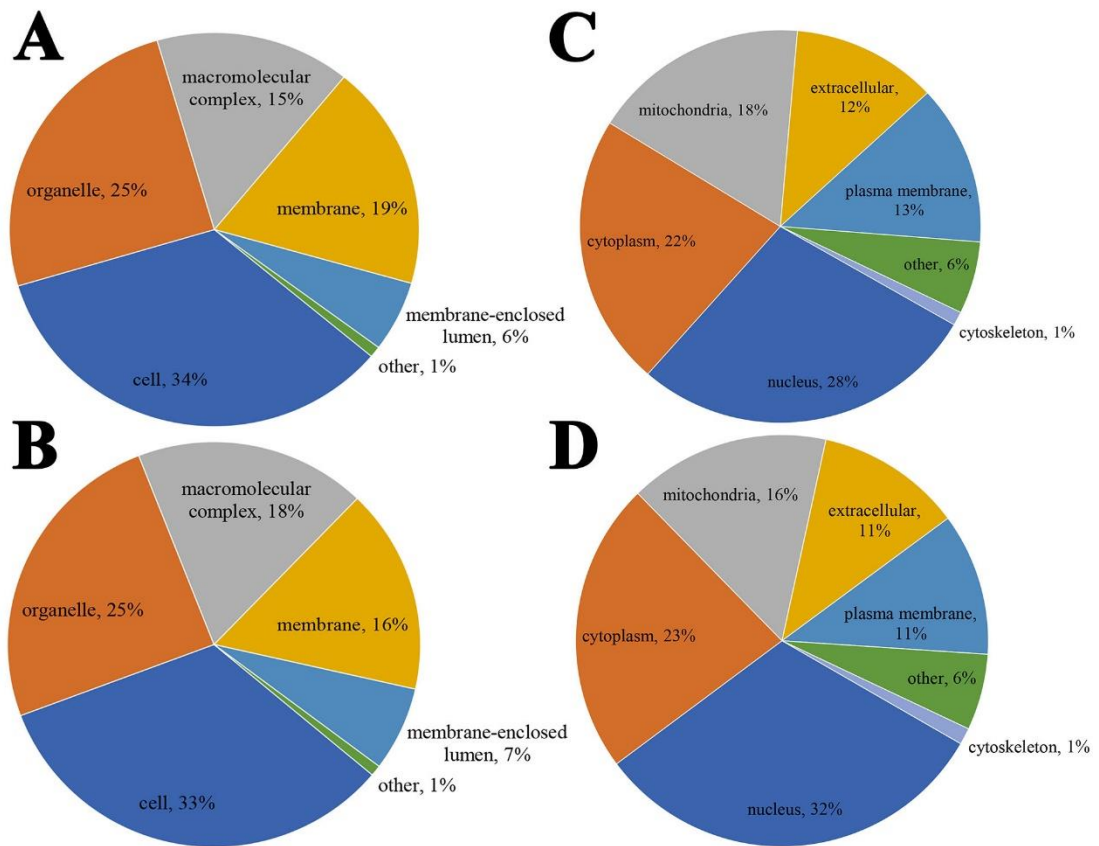

**FIG S5** Hyphal cellular component cluster analyses of differentially expressed proteins according to the gene ontology annotation after *M. grisea* hypha was treated with 20  $\mu\text{g/ml}$  (A) and 50  $\mu\text{g/ml}$  fengycin BS155 (B). Subcellular localization analyses of differentially expressed proteins after the hyphal cells were treated with 20  $\mu\text{g/ml}$  (C) and 50  $\mu\text{g/ml}$  fengycin BS155 (D).
